# Supplementary material for: Co-ordination ability towards CuII of the 29-amino acid residue trypsin inhibitor of squash and two of its analogues †
Source: Royal Society of Chemistry journal article supplement (doi:10.1039/b008790o), 2001-01-01
Supplement: b008790o-s3.doc [file b008790o-s3.doc]

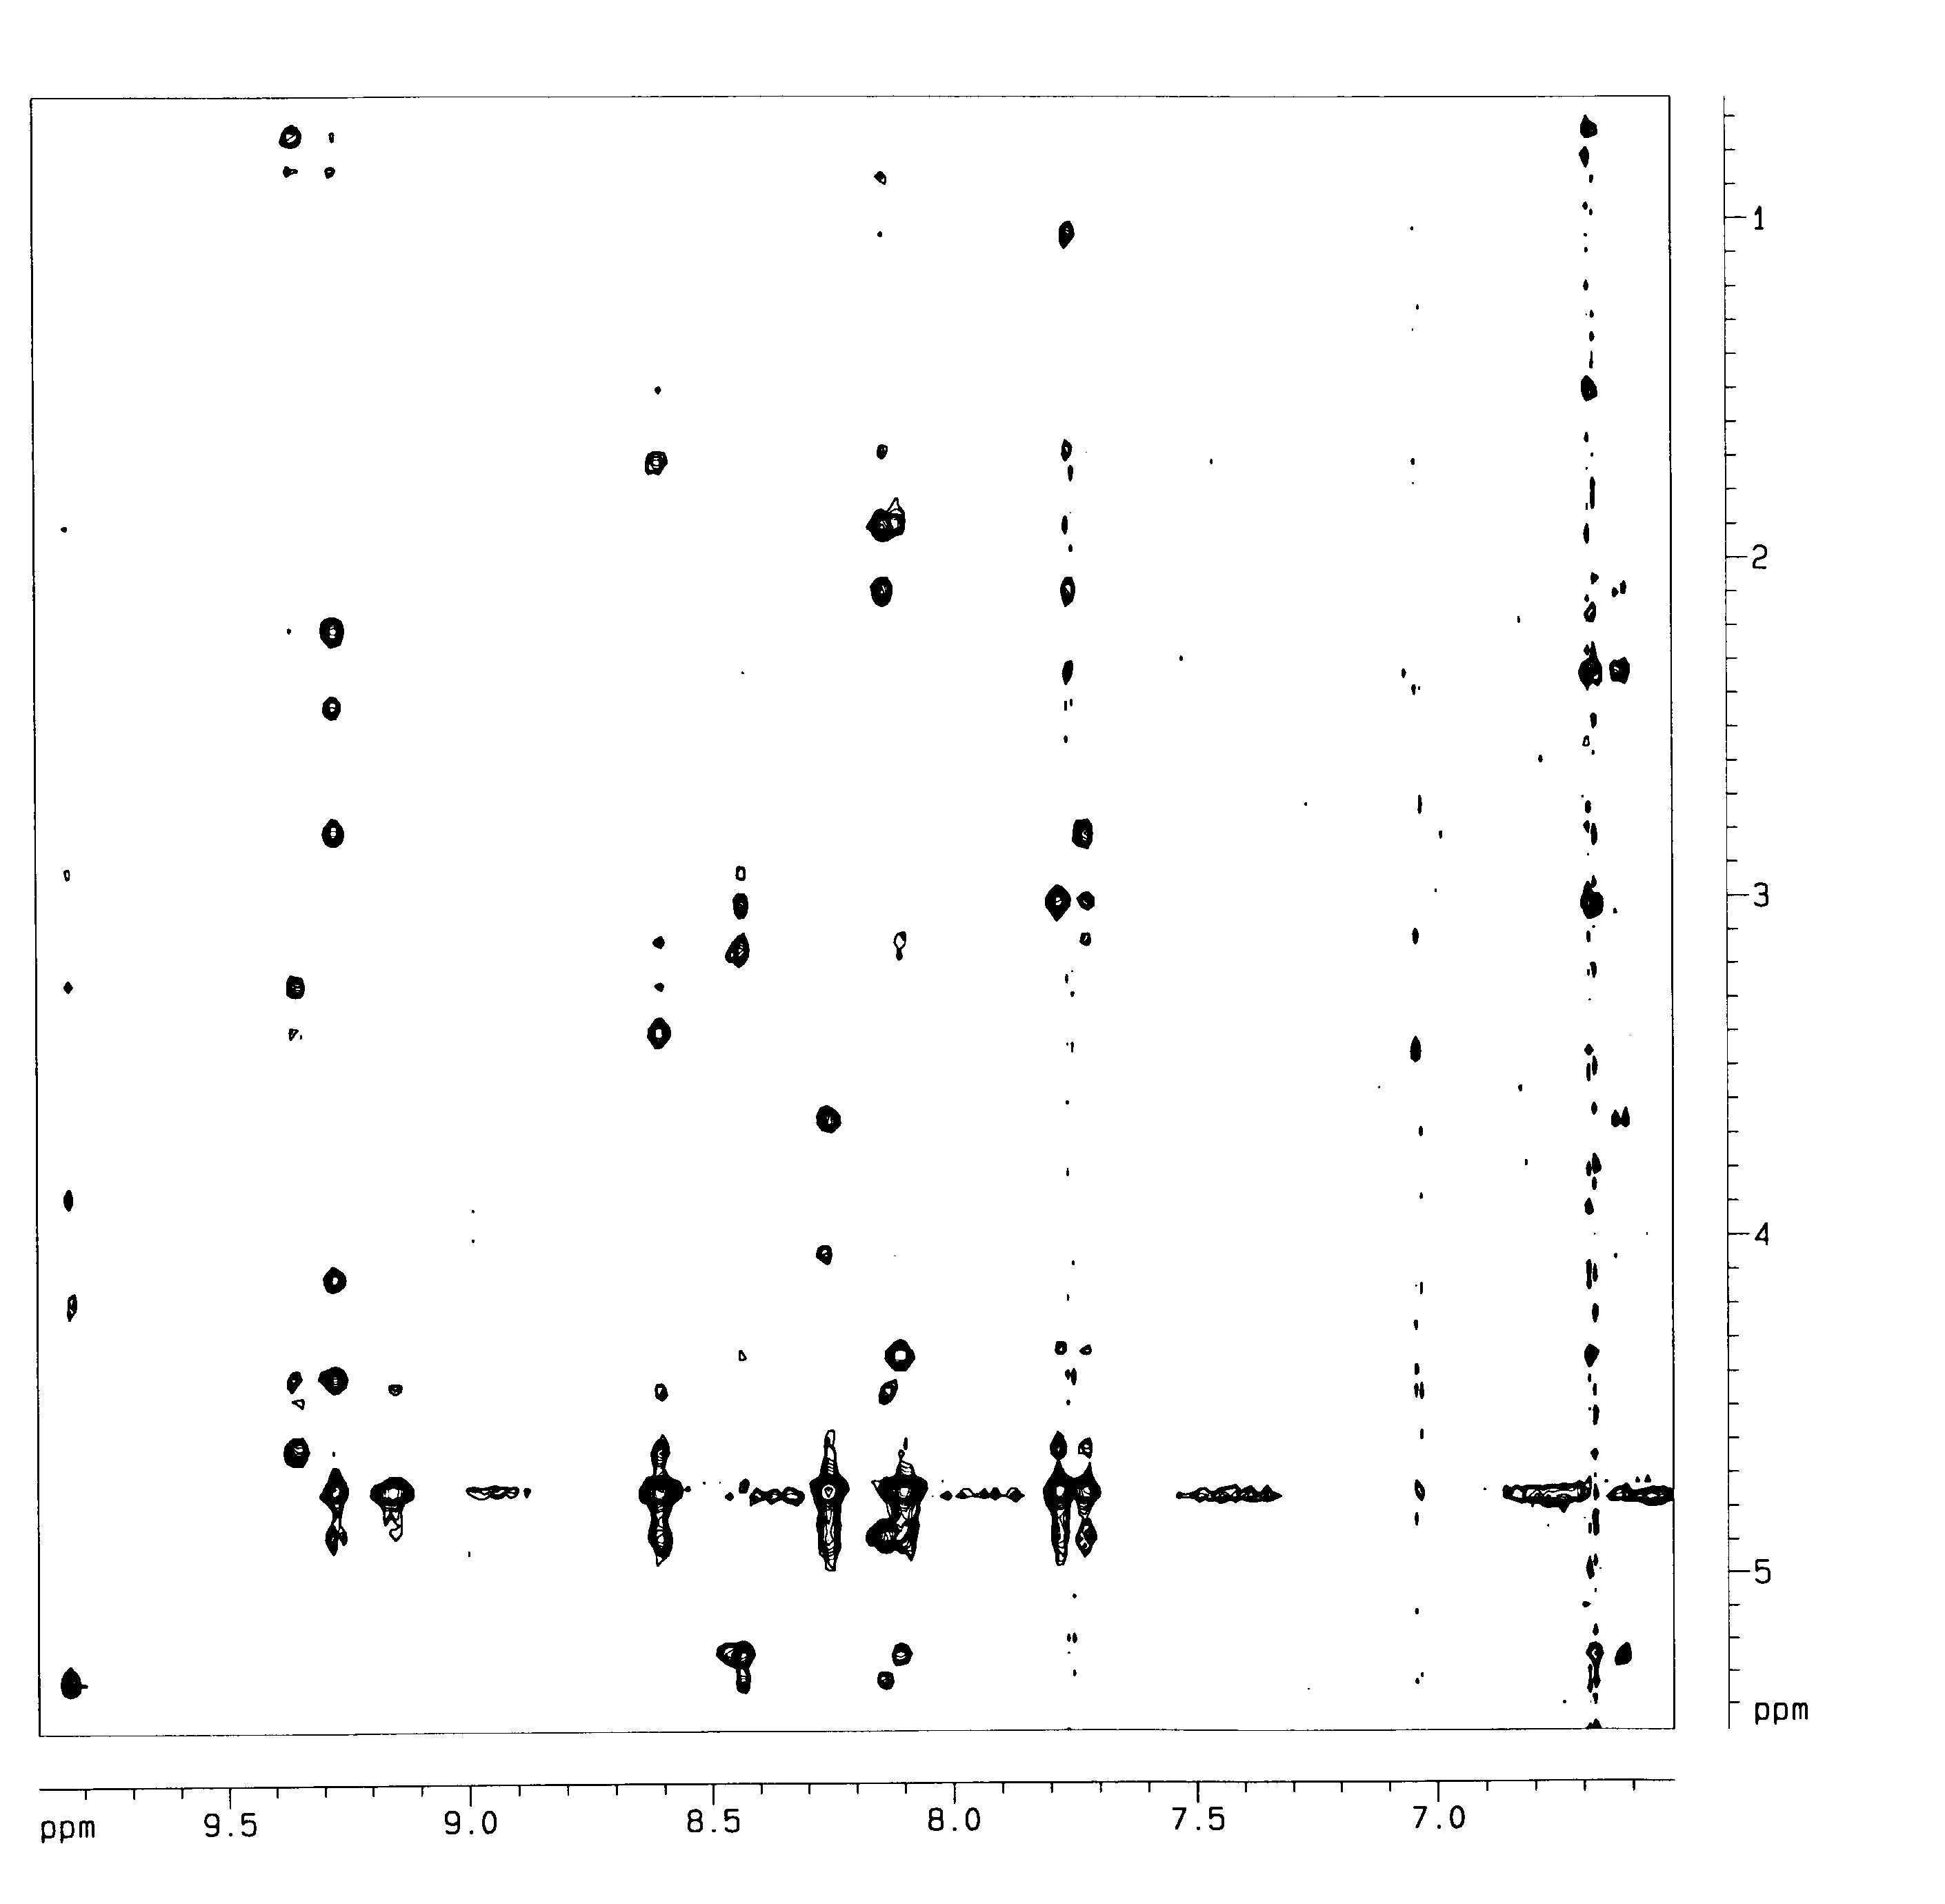


27TyrH(2,6-3,5)-7LeuH

27TyrH(2,6-3,5)-7LeuH

25HisH2-24GluH

27TyrH(2,6-3,5)-9GluH

27TyrH(2,6-3,5)-9GluH

25HisH2-23LeuH

25HisH2-24GluH

25HisH2-23LeuH

22CysNH-13AspH

23LeuNH-28CysH 10CysNH-27TyrH
