# Supplementary material for: Co-ordination ability towards CuII of the 29-amino acid residue trypsin inhibitor of squash and two of its analogues †
Source: Royal Society of Chemistry journal article supplement (doi:10.1039/b008790o), 2001-01-01
Supplement: b008790o-t1.doc [file b008790o-t1.doc]

Table S1. 600 MHz 1H-NMR chemical shifts (, ppm) of amide and aromatic protons of CMTI-I 2.3 x10-3 mol dm-3 in D2O 8 % - H2O 92 %. T = 303 K.

| Residues | **pH = 4.8** | **pH = 10.3** |
| --- | --- | --- |
| **2Val-NH** | 9.07 | - |
| **3Cys-NH** | 8.53 | - |
| **6Ile-NH** | 7.44 | - |
| **7Leu-NH** | 8.71 | - |
| **8Met-NH** | 9.07 | 9.10 |
| **9Glu-NH** | 8.71 | - |
| **10Cys-NH** | 8.13 | 8.11 |
| **11Lys-NH** | 8.39 | - |
| **12Lys-NH** | 8.09 | 8.09 |
| **13Asp-NH** | 9.03 | - |
| **14Ser-NH** | 8.01 | - |
| **15Asp-NH** | 7.76 | 7.78 |
| **16Cys-NH** | 7.77 | 7.74 |
| **17Leu-NH** | 8.55 | 8.59 |
| **18Ala-NH** | 8.43 | - |
| **19Glu-NH** | 8.44 | - |
| **20Cys-NH** | 8.63 | 8.60 |
| **21Val-NH** | 9.35 | 9.35 |
| **22Cys-NH** | 9.24 | 9.28 |
| **23Leu-NH** | 8.25 | 8.14 |
| **24Glu-NH** | 8.63 | - |
| **25His-NH** | 8.15 | - |
| **25His-H2** | 8.53 | 7.76 |
| **25His-H4** | 7.31 | 7.04 |
| **26Gly-NH** | 8.33 | 8.26 |
| **27Tyr-NH** | 6.88 | 6.61 |
| **27Tyr-Hortho** | 6.90 | 6.71 |
| **27Tyr-Hmeta** | 6.76 | 6.67 |
| **28Cys-NH** | 8.48 | 8.44 |
| **29Gly-NH** | 9.79 | 9.78 |
