# Supplementary figures and images for: Co-ordination ability towards CuII of the 29-amino acid residue trypsin inhibitor of squash and two of its analogues †
Source: Royal Society of Chemistry journal article supplement (doi:10.1039/b008790o), 2001-01-01

25His 2C-H

25His 4C-H


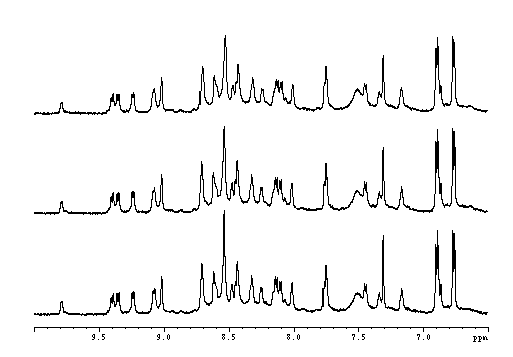


11Lys-NH

6Ile-NH

**c**

**b**

**a**

Supplement: b008790o-s1.doc [file b008790o-s1.doc]
